# Supplementary material for: Seasonal variation and release of soluble reactive phosphorus in an agricultural upland headwater in central Germany
Source: Copernicus journal article supplement (doi:10.5194/hess-27-1261-2023), 2023-03-22
Supplement: Supplementary file 1 [file hess-27-1261-2023-supplement.pdf]

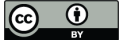

*Supplement of*

## **Seasonal variation and release of soluble reactive phosphorus in an agricultural upland headwater in central Germany**

**Michael Rode et al.**

*Correspondence to:* Michael Rode ([michael.rode@ufz.de](mailto:michael.rode@ufz.de))

The copyright of individual parts of the supplement might differ from the article licence.

**Supplement**

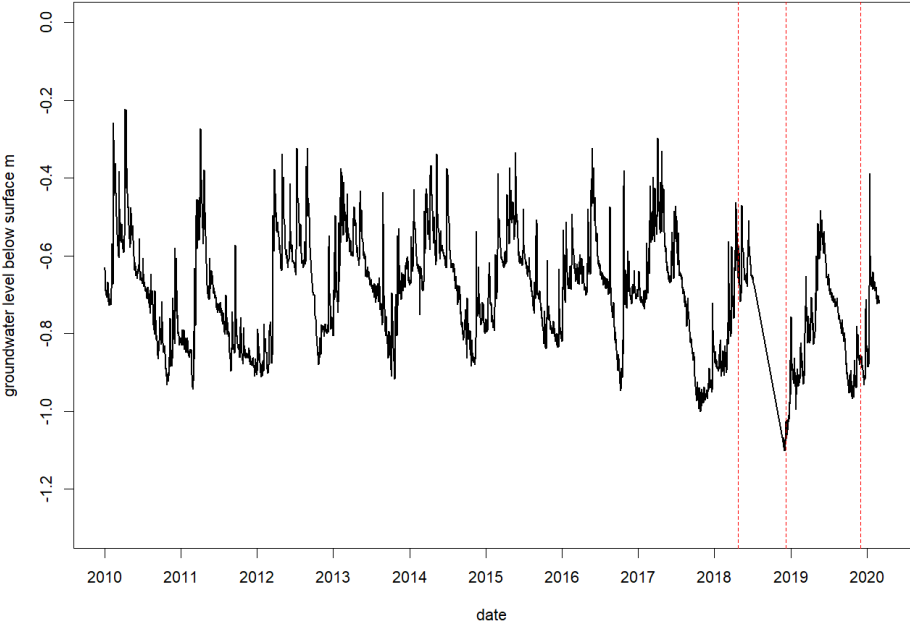

**Figure S1:** Tapping results for groundwater well 61 from 2010 to 2021 in meters, taken under the upper edge of the underground pipe. Red dotted lines mark measurement campaign dates.

**Data1:****Schäfertal groundwater data**

Location\_GW;SRP [mg/L];Date

SB 102;0.045;18.11.2014

SB 103;0.046;18.11.2014

SB 120;0.035;18.11.2014

SB 30;0.046;17.11.2014

SB 30 B;0.027;17.11.2014

SB 31;0.065;17.11.2014

SB 23;0.05;17.11.2014

SB 35;0.032;17.11.2014

SB 36;0.048;17.11.2014

SB 41;0.374;17.11.2014

SB 42;0.142;17.11.2014

SB 52;0.067;18.11.2014

SB 53;0.079;18.11.2014

SB 57;0.36;18.11.2014

SB 58A;0.029;18.11.2014

SB 61;0.021;20.11.2014

SB 74;0.01;18.11.2014

SB B;0.021;17.11.2014

SB 40;0.053;17.11.2014

SB 30 B;0.047;08.09.2020

SB 57;0.068;08.09.2020

SB 58A;0.036;08.09.2020

SB 61;0.012;08.09.2020

SB 62;0.029;08.09.2020

SB 66;0.038;08.09.2020
